# Supplementary material
Source: Royal Society of Chemistry journal article supplement (doi:10.1039/d6cy00123h)
Supplement: d6cy00123h1.pdf [file d6cy00123h1.pdf]

Sulfur-Confinement Synthesis of L<sub>10</sub>-PtZn Intermetallic Catalysts for Enhanced Oxygen Reduction

Delai Wang<sup>1</sup>, Guoyu Lin<sup>1</sup>, Hai-Qun Xu<sup>1\*</sup>, Zihao Zhai<sup>1</sup>, Chang Mei<sup>1</sup>, Xiang Chen<sup>1</sup>, Guangshun Wu<sup>1</sup>, Zheng Cao<sup>1</sup>, Zhen Jin<sup>1</sup>, Shilong Xu<sup>1\*</sup>, Di Wang<sup>1</sup>, Lei Wang<sup>2</sup>, Weiwei Dong<sup>1\*</sup>, Xiaoran Niu<sup>3\*</sup>, Yi Ding<sup>1\*</sup>

<sup>1</sup>School of Materials and Chemical Engineering, Anhui Jianzhu University, Hefei, Anhui 230601, China

<sup>2</sup>School of Chemistry and Chemical Engineering, Yangzhou University, Yangzhou, Jiangsu 225002, China.

<sup>3</sup>School of Chemistry and Chemical Engineering, Anhui University, Hefei, Anhui230039, China

E-mail: xuhaiqun@ahjzu.edu.cn; xslong@ahjzu.edu.cn; wwdong@ahjzu.edu.cn; xiaoran.niu@ahu.edu.cn; dyrqf@ahjzu.edu.cn

### Catalyst preparation

Typically, 26.5 mg of  $\text{H}_2\text{PtCl}_6 \cdot 6\text{H}_2\text{O}$ , 6.07 mg of  $\text{ZnCl}_2 \cdot 6\text{H}_2\text{O}$ , and 6.09 mg of thiourea were dispersed in 20 mL of ultrapure water and ultrasonicated for 5 min to obtain a homogeneous metal salt solution, maintaining a Pt:Zn molar ratio of 2:1. Subsequently, 37 mg of Black Pearl carbon was added as the support, followed by ultrasonication for 1 h to form a uniform suspension. The mixture was then stirred at 60 °C until complete evaporation of water, yielding a smooth slurry, which was further dried in a vacuum oven at 60 °C for 12 h. The dried black solid was thoroughly ground, placed in a tubular furnace, and annealed at 300–800 °C for 2 h under an Ar/ $\text{H}_2$  atmosphere with a heating rate of 5 °C·min<sup>-1</sup>, followed by natural cooling to room temperature. The resulting catalysts were denoted as PtZn/S-C-T, where *T* represents the reduction/pyrolysis temperature. The PtZn-C catalysts were synthesized with same method.

### Catalyst characterization

Transmission electron microscopy (TEM) and scanning transmission electron microscopy (STEM) images were obtained using a JEOL JEM-2100F operating at 200 kV. X-ray diffraction (XRD) of all synthesized catalysts was performed using a SmartLab-SE diffractometer with Cu-K $\alpha$  radiation ( $\lambda = 1.5418 \text{ \AA}$ ). X-ray photoelectron spectroscopy (XPS) results were collected using an AXIS-ULTRA DLD-00W instrument. Inductively coupled plasma optical emission spectroscopy (ICP-OES) was conducted using an Avio 200 instrument. X-ray Absorption Fine Structure (XAFS) measurements at the Pt L<sub>3</sub>-edge and Cu K-edge were carried out at the 1W1B beamline of the Beijing Synchrotron Radiation Facility (BSRF), which operates at 2.5 GeV and 250 mA.

### Electrochemical performance test

For ink preparation, 3 mg of catalyst was dispersed in 1 mL of 0.1wt.% Nafion solution and ultrasonicated in an isopropanol/water mixture for 1 h. Subsequently, 5  $\mu\text{L}$  of the ink was drop-cast onto a rotating disk electrode (RDE, 5 mm in diameter), yielding a Pt loading of 15  $\mu\text{g}_{\text{Pt}} \text{ cm}^{-2}$ . All electrochemical measurements were carried out on a CHI 760E electrochemical workstation using a conventional three-electrode configuration, with the catalyst-coated RDE as the working electrode, a reversible hydrogen electrode (RHE) as the reference electrode, and a Pt wire as the counter electrode. The electrolyte temperature was maintained at 25 °C with a thermostatic water bath.

Cyclic voltammetry (CV) was performed in  $\text{N}_2$ -saturated 0.1 M  $\text{HClO}_4$  solution within a potential window of 0.05–1.05 V (vs. RHE) at a scan rate of 50  $\text{mV} \cdot \text{s}^{-1}$ . Linear sweep voltammetry (LSV) was conducted in  $\text{O}_2$ -saturated 0.1 M  $\text{HClO}_4$  over the potential range of 0.05–1.05 V (vs. RHE) at a scan rate of 10  $\text{mV} \cdot \text{s}^{-1}$ . Accelerated durability tests (ADT) were performed in  $\text{O}_2$ -saturated 0.1 M  $\text{HClO}_4$  by potential cycling between 0.6 and 1.0 V (vs. RHE) at 100  $\text{mV} \cdot \text{s}^{-1}$  for 30,000 cycles

### Fuel cell performance testing

The performance of  $\text{H}_2$ - $\text{O}_2$  and  $\text{H}_2$ -air fuel cells was evaluated using a commercial Scribner 850e test system with single cells. Membrane electrode assemblies (MEAs) with an active area of 5  $\text{cm}^2$  were fabricated by ultrasonically spraying well-dispersed catalyst ink onto a Nafion HP proton exchange membrane (GORE, 15  $\mu\text{m}$  thickness). Commercial gas diffusion layers

(Sigracet) were then hot-pressed onto both sides of the membrane at 1 MPa for 90 s. The commercial gas diffusion layer (GDL) with a microporous layer and a thickness of 250  $\mu\text{m}$  at 25 kPa (Freudenberg H24CX483) was used. Before the performance testing, the cell was conditioned as follows. The cell temperature was increased to 60°C, and hydrogen and air with an atmospheric pressure were supplied to the anode and cathode, respectively. The relative humidity of the gases was controlled to be 80%, and the flow rates were 0.5 L/min for the anode and 1 L/min for the cathode. After starting the gas supplies, the cell voltage was scanned between 0-1.0 V at the rate of 0.01 V/s for 20 cycles. The H<sub>2</sub>-air performance test was performed using a square wave voltage by scanning the voltage from open circuit voltage to 0.2 V with each voltage for 30 s. The Pt loadings were controlled at 0.1 mg·cm<sup>-2</sup> for both the anode (commercial Pt/C, 20 wt% Pt, Johnson Matthey) and the cathode (PtZn catalyst and 20 wt% Pt/C). The single cell was operated at 80 °C with fully humidified H<sub>2</sub>/air (150 kPa, 0.5/2.0 mL/min, 100% RH). Prior to performance evaluation, the cell was conditioned by continuous activation. Accelerated stress tests (ASTs) were conducted according to the DOE protocol, with pure H<sub>2</sub> and N<sub>2</sub> supplied to the anode and cathode, respectively. The cell voltage was cycled between 0.6 and 0.95 V in a square-wave profile, with each voltage step maintained for 3 s.

#### **Density functional theory (DFT) calculations**

DFT calculations were performed using the Vienna *ab initio* Simulation Package (VASP) with the projector augmented wave (PAW) method. The exchange–correlation interactions were treated within the generalized gradient approximation (GGA) using the Perdew-Burke-Ernzerhof (PBE) functional, and a plane-wave energy cutoff of 400 eV was applied.

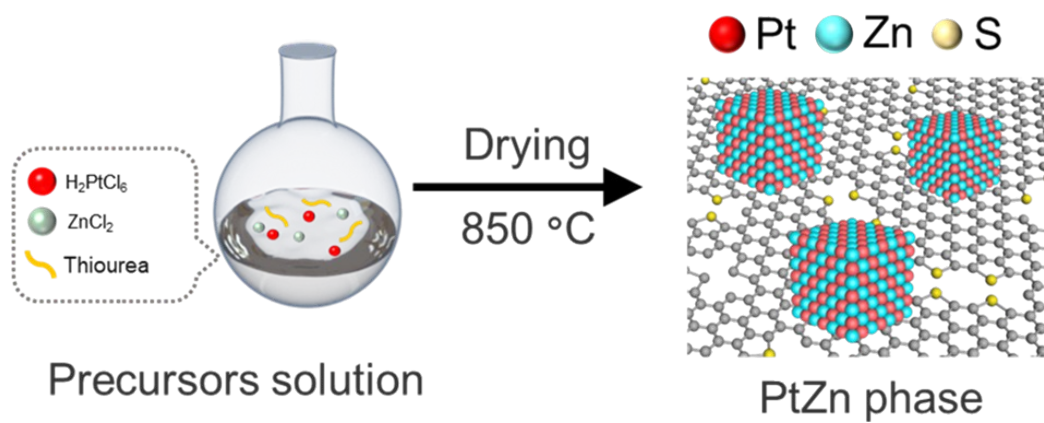

**Figure S1.** Schematic diagram of  $\text{L1}_0$ -PtZn catalyst synthesis

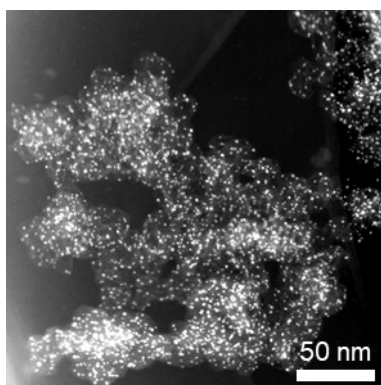

**Figure S2.** low-magnification TEM images of the PtZn/S-C catalyst.

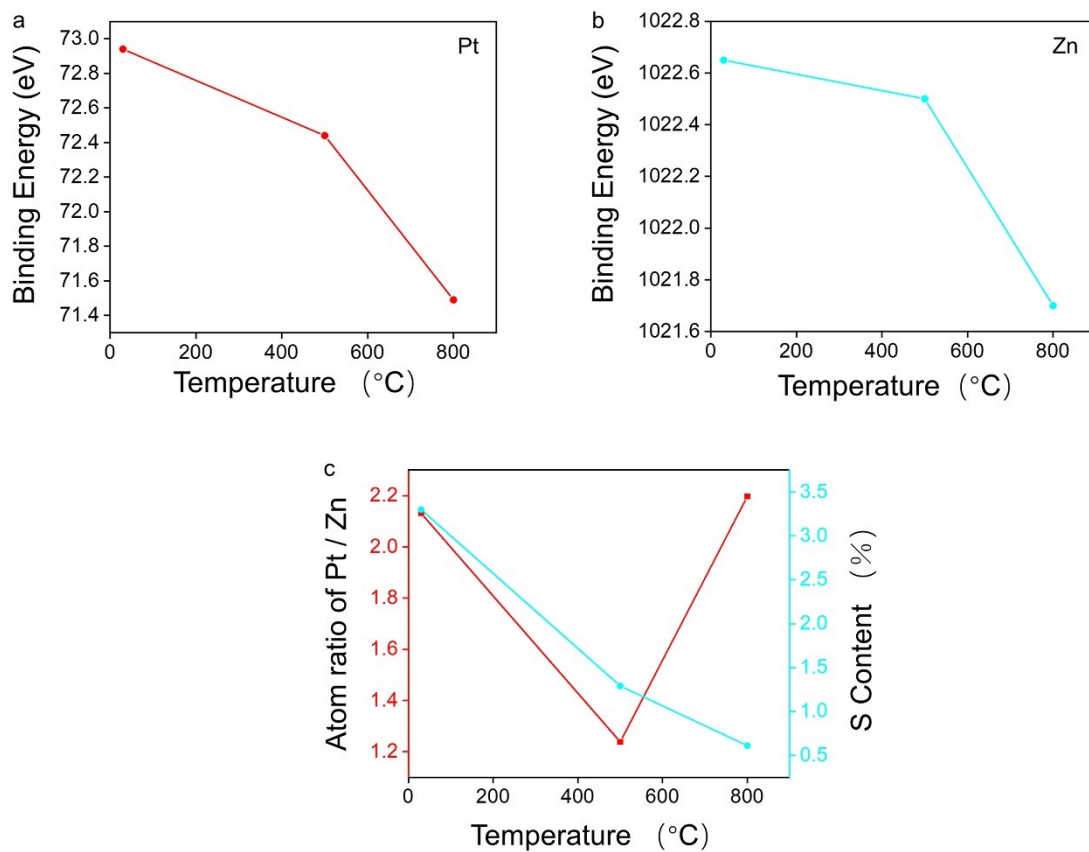

**Figure S3.** XPS results of Pt  $4f$  (a), Zn  $2p$  (b) and (c) S content and atom ratio of Pt/Zn with increased temperature.

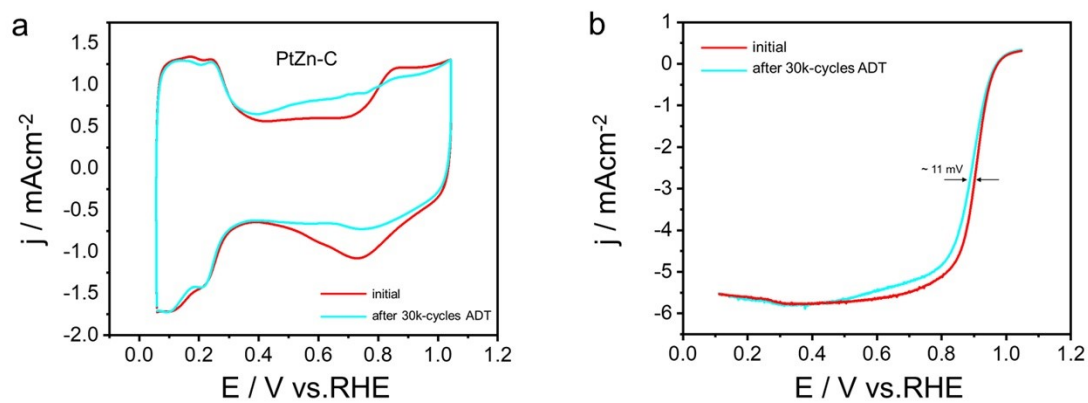

**Figure S4.** Electrochemical durability of PtZn-C catalyst: (a) CV curves and (b) LSV curves of PtZn-C-850 recorded before and after 30,000 ADT cycles, showing negligible changes in electrochemical features and ORR polarization behavior.

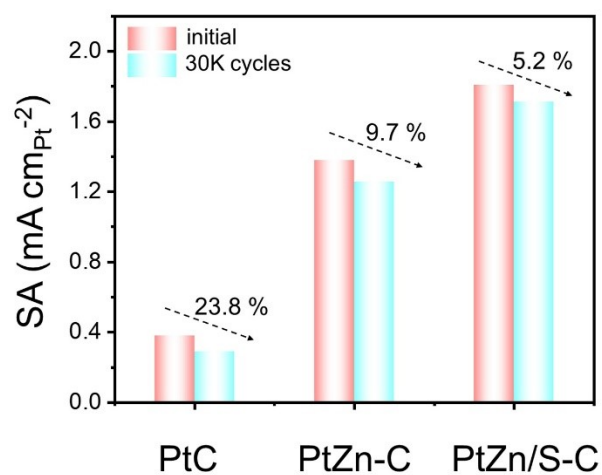

**Figure S5.** Comparison of specific activities for Pt/C, PtZn-C, PtZn/S-C catalyst after 30, 000 cycles durability test under 0.9 V.

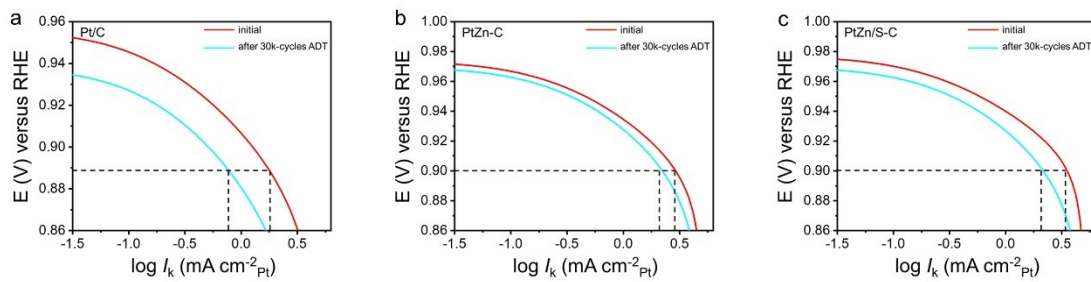

**Figure S6.** Tafel analysis before and after durability testing: (a), (b) and (c) Tafel plots of commercial Pt/C recorded before and after 30,000 ADT cycles.

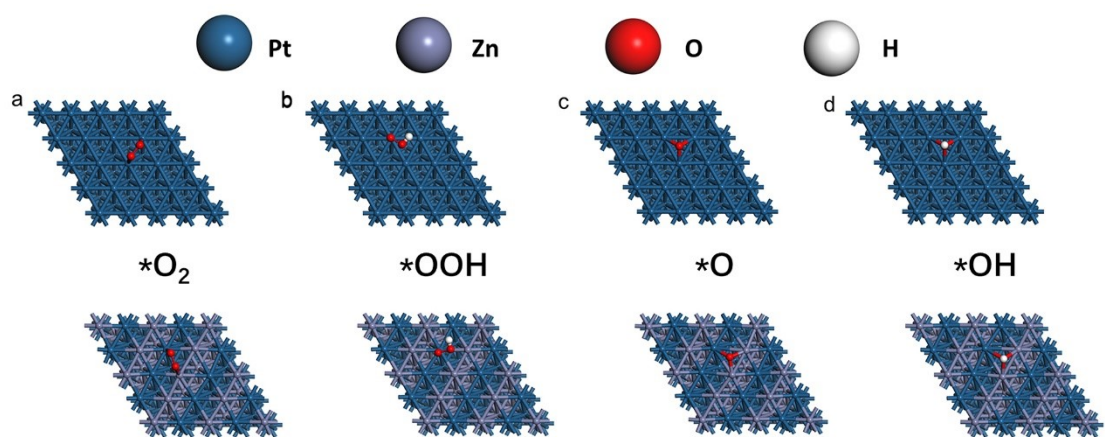

**Figure S7.** Adsorption/desorption model of oxygen reduction intermediates.

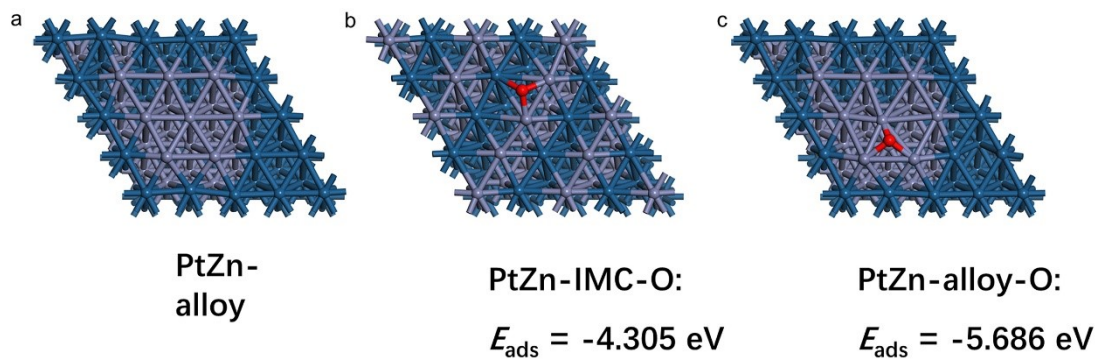

**Figure S8.** O\* Adsorption model and corresponding desorption energy of PtZn alloy and PtZn-IMC.

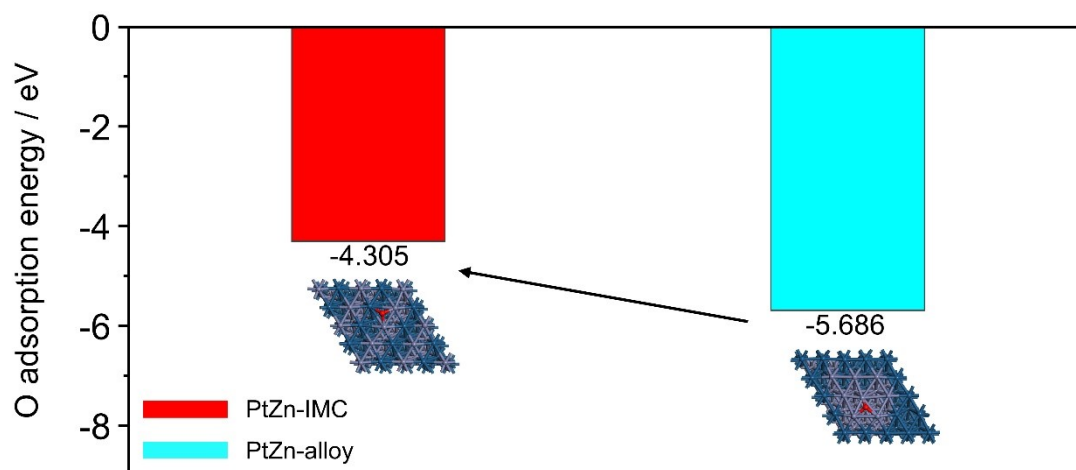

**Figure S9.** Adsorption free energy of O\* intermediate on Pt surface for PtZn alloy (cyan) and PtZn-IMC (red).

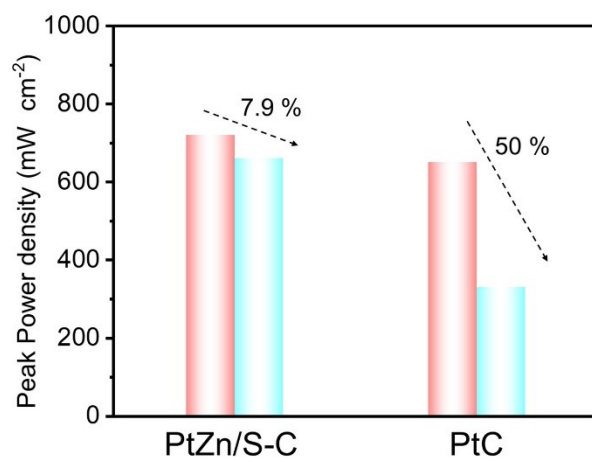

**Figure S10.** Comparison of peak power density for Pt/C, PtZn/S-C MEA catalyst after 30,000 cycles durability test.

Table S1. ICP-OES results of PtZn-S/C catalysts.

| Sample       | Pt (wt%) | Zn (wt%) | Pt/Zn |
|--------------|----------|----------|-------|
| PtZn-S/C-300 | 19.5     | 7.6      | 0.86  |
| PtZn-S/C-600 | 17.9     | 6.5      | 0.92  |
| PtZn-S/C-850 | 16.7     | 5.8      | 0.96  |

Table S2. Comparison of Particle size and Ordering degree for PtZn/S-C-T catalyst.

|              | Particle size | Ordering degree |
|--------------|---------------|-----------------|
| PtZn/S-C-300 | 2.46 nm       | /               |
| PtZn/S-C-600 | 2.83 nm       | /               |
| PtZn/S-C-800 | 3.05 nm       | 55.8            |
| PtZn/S-C-850 | 3.15 nm       | 80.1            |
| PtZn-C-850   | 58.27 nm      | 64.3            |

Table S3. XPS peak of Pt<sub>4f</sub> fitting results.

|        | Area Pt (0) | Area Pt(II) | Pt (0)/<br>Pt (0) + Pt(II) |
|--------|-------------|-------------|----------------------------|
| 300 °C | 22833       | 23936       | 0.488                      |
| 600 °C | 20272       | 25267       | 0.445                      |
| 850 °C | 78849       | 35688       | 0.688                      |

Table S4. Comparison of ECSA, MA and SA for Pt/C catalyst after 30, 000 cycles durability test.

| Pt/C    | ECSA ( $\text{m}^2 \text{g}_{\text{Pt}}^{-1}$ ) | MA ( $\text{A mg}_{\text{Pt}}^{-1}$ ) | SA ( $\text{mA cm}_{\text{Pt}}^{-2}$ ) |
|---------|-------------------------------------------------|---------------------------------------|----------------------------------------|
| initial | 66.08                                           | 0.25                                  | 0.38                                   |
| 30k     | 28.58                                           | 0.08                                  | 0.29                                   |

Table S5. Comparison of ECSA, MA and SA for PtZn-C catalyst after 30, 000 cycles durability test.

| PtZn-C  | ECSA ( $\text{m}^2 \text{g}_{\text{Pt}}^{-1}$ ) | MA ( $\text{A mg}_{\text{Pt}}^{-1}$ ) | SA ( $\text{mA cm}_{\text{Pt}}^{-2}$ ) |
|---------|-------------------------------------------------|---------------------------------------|----------------------------------------|
| initial | 80.06                                           | 1.11                                  | 1.39                                   |
| 30k     | 66.24                                           | 0.83                                  | 1.26                                   |

Table S6. Comparison of ECSA, MA and SA for PtZn/S-C catalyst after 30, 000 cycles durability test.

| PtZn/S-C | ECSA ( $\text{m}^2 \text{g}_{\text{Pt}}^{-1}$ ) | MA ( $\text{A mg}_{\text{Pt}}^{-1}$ ) | SA ( $\text{mA cm}_{\text{Pt}}^{-2}$ ) |
|----------|-------------------------------------------------|---------------------------------------|----------------------------------------|
| initial  | 83.06                                           | 1.50                                  | 1.81                                   |
| 30k      | 81.36                                           | 1.39                                  | 1.71                                   |

Table S7. H<sub>2</sub>-air polarization performance of PtZn catalyst.

| Current density<br>(A/cm <sup>2</sup> ) | Power density<br>(W/cm <sup>2</sup> ) | Cell voltage (V) | HFR<br>(mΩ/cm <sup>2</sup> ) |
|-----------------------------------------|---------------------------------------|------------------|------------------------------|
| 8.1536E-4                               | 7.5591E-4                             | 0.92811          | 47.68                        |
| 0.03812                                 | 0.03356                               | 0.88177          | 47.53                        |
| 0.07949                                 | 0.06593                               | 0.83257          | 47.54                        |
| 0.20362                                 | 0.15877                               | 0.7865           | 47.43                        |
| 0.40433                                 | 0.29514                               | 0.7428           | 47.46                        |
| 0.6503                                  | 0.44228                               | 0.70006          | 47.43                        |
| 0.89551                                 | 0.56368                               | 0.65618          | 47.44                        |
| 1.09491                                 | 0.63452                               | 0.61159          | 47.42                        |
| 1.24789                                 | 0.66104                               | 0.56629          | 47.46                        |
| 1.36118                                 | 0.65331                               | 0.5202           | 47.445                       |
| 1.45741                                 | 0.62583                               | 0.47405          | 47.39                        |
| 1.53622                                 | 0.58311                               | 0.4292           | 47.35                        |
| 1.59746                                 | 0.52697                               | 0.38614          | 47.38                        |
| 1.64617                                 | 0.46089                               | 0.34352          | 47.395                       |

Table S8. H<sub>2</sub>-air polarization performance of Pt/C catalyst.

| Current density<br>(A/cm <sup>2</sup> ) | Power density (W/cm <sup>2</sup> ) | Cell voltage (V) | HFR<br>(mΩ/cm <sup>2</sup> ) |
|-----------------------------------------|------------------------------------|------------------|------------------------------|
| 0                                       | 0                                  | 0.8625           | 48.875                       |
| 0.0096                                  | 0.00794                            | 0.82549          | 48.945                       |
| 0.03495                                 | 0.02734                            | 0.78242          | 48.82                        |
| 0.06408                                 | 0.04643                            | 0.7306           | 48.63                        |
| 0.13345                                 | 0.09005                            | 0.68566          | 48.855                       |
| 0.24652                                 | 0.15385                            | 0.64302          | 48.715                       |
| 0.39053                                 | 0.22427                            | 0.60277          | 48.685                       |
| 0.54144                                 | 0.28397                            | 0.56236          | 48.655                       |
| 0.67089                                 | 0.31845                            | 0.52083          | 48.555                       |
| 0.76835                                 | 0.32585                            | 0.47594          | 48.74                        |
| 0.84464                                 | 0.31611                            | 0.42944          | 48.585                       |
| 0.91                                    | 0.309                              | 0.34             | 48.745                       |
